# Supplementary material for: Exploiting Pan Influenza A and Pan Influenza B Pseudotype Libraries for Efficient Vaccine Antigen Selection
Source: MDPI journal article supplement (doi:10.3390/vaccines9070741), 2021-07-05
Supplement: s1 [file s1]

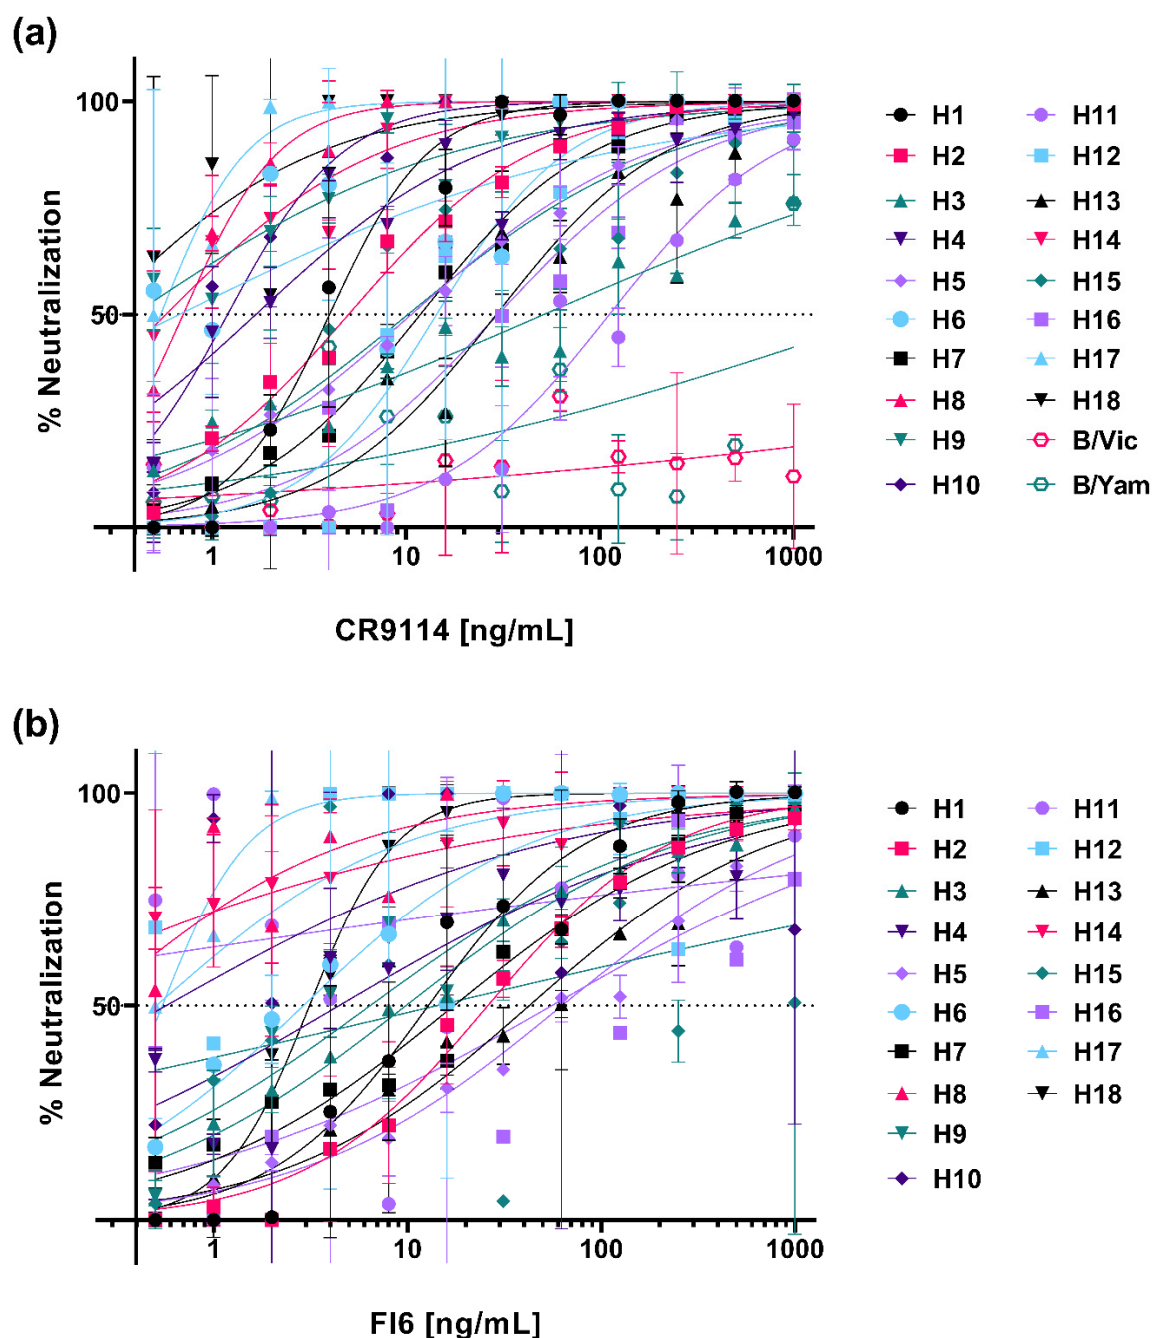

**Figure S1.** Neutralization of representative IAV and IBV PV *in vitro* by CR9114 and FI6. PV neutralization was measured by a luciferase reporter assay. **(a)** CR9114 and **(b)** FI6 were serially diluted two-fold from a starting concentration of 1000 ng/mL to 0.5 ng/mL against all pseudotypes. An input value of  $1.0 \times 10^6$  RLU of PV was then added to each well. For **(a)** and **(b)**, each point represents the mean and standard deviation of two replicates per dilution. IBV strains were not tested against FI6.

**Table S1.** List of influenza hemagglutinin pseudotypes (PV) available at the Viral Pseudotype Unit, University of Kent. Protease employed to achieve the highest pseudotype titers are indicated.

| GROUP I INFLUENZA A HEMAGGLUTININ |                                                |             |          |          |
|-----------------------------------|------------------------------------------------|-------------|----------|----------|
| SUBTYPE                           | STRAIN                                         | ACCESSION # | PLASMI D | PROTEASE |
| H1                                | A/South Carolina/1/1918                        | AF117241.1  | phCMV1   | TMPRSS4  |
|                                   | A/Puerto Rico/8/1934                           | AF389118.1  | pI.18    | TMPRSS4  |
|                                   | A/New Caledonia/20/1999                        | EU103824.1  | phCMV1   | TMPRSS4  |
|                                   | A/duck/Italy/1447/2005                         | HF563054.1  | pI.18    | TMPRSS4  |
|                                   | A/Solomon Islands/3/2006                       | EU124177.1  | pI.18    | TMPRSS4  |
|                                   | A/Brisbane/59/2007                             | CY163864.1  | pI.18    | TMPRSS4  |
|                                   | A/California/7/2009                            | CY121680.1  | pI.18    | TMPRSS4  |
|                                   | A/Texas/05/2009                                | GQ457487.1  | pI.18    | HAT      |
|                                   | A/England/195/2009                             | GQ166661.1  | pEVAC    | TMPRSS4  |
|                                   | A/Bolivia/559/2013                             | EPI466837   | pEVAC    | TMPRSS4  |
|                                   | A/swine/Guangxi/1/2013<br>2013_12_26_4         | KJ725056    | pEVAC    | TMPRSS4  |
|                                   | A/Michigan/45/2015                             | EPI662594   | pEVAC    | TMPRSS4  |
|                                   | A/Slovenia/2903/2015                           | EPI768541   | pEVAC    | TMPRSS4  |
|                                   | A/Brisbane/02/2018                             | EPI1383389  | pEVAC    | TMPRSS4  |
|                                   | A/swine/Henan/SN10/2018<br>2018_02_4           | MN416619    | pEVAC    | TMPRSS4  |
|                                   | A/swine/Beijing/0301/2018<br>2018_03_4         | MN416589    | pEVAC    | TMPRSS4  |
| H2                                | A/Korea/426/1968                               | CY125846.1  | pI.18    | HAT      |
|                                   | A/quail/Rhode Island/16-018622-<br>1/2016 (H2) | KY272859    | pEVAC    | TMPRSS4  |
|                                   | A/duck/Germany/1215/1973                       | CY014710.1  | pI.18    | TMPRSS4  |
| H5                                | A/Hong Kong/156/1997                           | AAC40508.1  | pI.18    | none     |
|                                   | A/Hong Kong/213/2003                           | ABP51977.1  | pI.18    | none     |
|                                   | A/Vietnam/1194/2004                            | ABP51976.1  | pI.18    | none     |
|                                   | A/Vietnam/1203/2004                            | AB51977.1   | pI.18    | none     |
|                                   | A/Indonesia/5/2005                             | ABW06108.1  | pI.18    | none     |
|                                   | A/turkey/Turkey/1/2005                         | ABD73284.1  | pI.18    | none     |
|                                   | A/Anhui/1/2005                                 | ABD28180.1  | pI.18    | none     |

|     |                                              |                          |                 |              |
|-----|----------------------------------------------|--------------------------|-----------------|--------------|
|     | A/whooper swan/Mongolia/244/2005             | GU186700.1<br>ACZ36881.1 | pEVAC<br>pI.18  | none         |
|     | A/bar-headed goose/Qinghai/2005              | BAE4815.1                | pI.18           | none         |
|     | A/Jwe/Hong Kong/1038/2006                    | ACJ26110.1A              | pI.18           | none         |
|     | A/chicken/Mexico/07/2007                     | KJ729343                 | pEVAC           | none         |
|     | A/Egypt/2629-NAMRU/2007                      | ABM92273.1               | pI.18           | none         |
|     | A/chicken/Egypt 1709-01/2007                 | ACD64996.1               | pI.18           | none         |
|     | A/chicken/Egypt 1709-06/2008                 | ACD65000.1               | pI.18           | none         |
|     | A/gyrfalcon/Washington/41088-6/2014          | KP307984                 | pI.18,<br>pEVAC | none<br>none |
|     | A/mallard/Netherlands/41/2015                | MF694083                 | pEVAC           | none         |
| H6  | A/American wigeon/California/HS007A/2015     | KY983173                 | pEVAC           | TMPRSS4      |
|     | A/duck/Vietnam/HU9-455/2018                  | LC497121                 | pEVAC           | TMPRSS4      |
| H8  | A/turkey/Ontario/6118/1968                   | CY014659.1               | pI.18           | TMPRSS4      |
|     | A/mallard duck/Netherlands/7/2015            | MF682649                 | pEVAC           | TMPRSS4      |
|     | A/mallard duck/Ohio/16OS0672/2016            | MG280005                 | pEVAC           | TMPRSS4      |
| H9  | A/Hong Kong/1073/1999                        | AJ404626.1               | pI.18           | TMPRSS4      |
|     | A/chicken/Israel/291417/2017                 | MH558944                 | pEVAC           | TMPRSS4      |
| H11 | A/duck/Memphis/546/1974                      | AB292779                 | phCMV1          | TMPRSS4      |
|     | A/common teal/Netherlands/1/2015             | MF693986                 | pEVAC           | TMPRSS4      |
|     | A/red shoveler/Chile/C14653/2016             | MH134837                 | pEVAC           | TMPRSS4      |
| H12 | A/duck/Alberta/60/1976                       | CY130078.1               | phCMV1          | HAT          |
|     | A/duck/Mongolia/850/2018                     | MK979051                 | pEVAC           | TMPRSS4      |
|     | A/Northern Shoveler/Nevada/D1516557/2015     | MK928236                 | pEVAC           | TMPRSS4      |
| H13 | A/laughing gull/New Jersey/UGAI17-2843/2017  | MH068343                 | pEVAC           | TMPRSS4      |
|     | A/ring-billed gull/Minnesota/OPMNAI0816/2017 | MH763859                 | pEVAC           | TMPRSS4      |

| H16                                       | A/black-headed gull/Sweden/2/1999             | AY684888.1            | phCMV1   | HAT      |
|-------------------------------------------|-----------------------------------------------|-----------------------|----------|----------|
|                                           | A/black-headed gull/Netherlands/1/2016        | MF694134              | pEVAC    | TMPRSS4  |
|                                           | A/Mew Gull/Southcentral Alaska/18MB01898/2018 | MN210308              | pEVAC    | TMPRSS4  |
| H17                                       | A/Little shouldered bat/Guatemala/060/2011    | CY103892.1            | pI.18    | HAT      |
| H18                                       | A/flat-faced bat/Peru/33/2010                 | CY125945              | pEVAC    | T4       |
| <b>GROUP II INFLUENZA A HEMAGGLUTININ</b> |                                               |                       |          |          |
| SUBTYPE                                   | STRAIN                                        | ACCESSION #           | PLASMI D | PROTEASE |
| H3                                        | A/Texas/50/2012                               | KC892952.1            | pI.18    | TMPRSS4  |
|                                           | A/Udorn/307/1972                              | DQ508929.1            | pI.18    | TMPRSS2  |
|                                           | A/California/7/2004                           | CY114373.1            | pEVAC    | HAT      |
|                                           | A/Wisconsin/67/2005                           | CY034116.1            | pEVAC    | HAT      |
|                                           | A/Japan/WRAIR1059P/2008                       |                       | pEVAC    | HAT      |
|                                           | A/Switzerland/9715293/2013                    | EPI814528             | pEVAC    | HAT      |
|                                           | A/New Caledonia/71/2014                       | EPI551570             | pEVAC    | HAT      |
|                                           | A/duck/Quang Ninh/220/2014                    | LC053492              | pEVAC    | HAT      |
|                                           | A/ruddy turnstone/Delaware Bay/606/2017       | MH135712              | pEVAC    | TMPRSS2  |
|                                           | A/Kansas/14/2017                              | Vaccine strain, 3c3.A | pEVAC    | HAT      |
|                                           | A/Switzerland/8060/2017                       | EPI1326015            | pEVAC    | TMPRSS4  |
|                                           | A/South Australia/34/2019                     | EPI1607117            | pEVAC    | HAT      |
| H4                                        | A/duck/Czechoslovakia/1956                    | D90302.1              | phCMV1   | TMPRSS2  |
|                                           | A/green-winged teal/California/K218/2005      | CY045351              | pEVAC    | TMPRSS2  |
|                                           | A/Calidris ruficollis/Hokkaido/12EY0172/2012  | LC467224              | pEVAC    | TMPRSS2  |
| H7                                        | A/FPV/Rostock/1934                            | AAA43150              | phCMV1   | none     |
|                                           | A/chicken/Pakistan/34668/1995                 | CY035831              | pI.18    | none     |

|                    | A/chicken/Italy/1082/1999                          | CY022677                | pI.18               | TMPRSS2         |
|--------------------|----------------------------------------------------|-------------------------|---------------------|-----------------|
|                    | A/chicken/Italy/13474/1999                         | AJ491720                | pI.18               | none            |
|                    | A/chicken/Netherlands/1/2003                       | AAR02640.1              | pI.18               | none            |
|                    | A/chicken/Netherlands/219/2003                     | AAR02640.1              | pI.18               | none            |
|                    | A/Shanghai/2/2013                                  | KF021597<br>EPI448936   | pI.18,<br>pEVAC     | TMPRSS4         |
|                    | A/northern pintail<br>duck/California/UCD1582/2016 | MH251202                | pEVAC               | TMPRSS4         |
|                    | A/duck/Viet Nam/HU10-64/2018                       | MK629228                | pEVAC               | TMPRSS4         |
|                    | A/Anhui/1/2013                                     | CY187618.1              | pEVAC               | TMPRSS4         |
| H10                | A/duck/Bangladesh/24268/2015                       | MH071504                | pEVAC               | TMPRSS4         |
|                    | A/mallard/Utah/D1802334/2018                       | MK995817                | pEVAC               | TMPRSS4         |
|                    | A/chicken/Germany/N49                              | CY014671.1              | pEVAC               | TMPRSS4         |
| H14                | A/mallard/Astrakhan/263/1982                       | AB289335.1<br>CY014604  | phCMV1<br>pEVAC     | TMPRSS4         |
|                    | A/blue-winged<br>Teal/Ohio/18OS1695/2018           | MN431050                | pEVAC               | TMPRSS4         |
| H15                | A/shearwater/West<br>Australia/2576/1979           | CY130102.1<br>CY006010  | phCMV1<br>pEVAC     | TMPRSS4         |
|                    | A/duck/Bangladesh/24697/2015                       | KY635719                | pEVAC               | TMPRSS4         |
| <b>INFLUENZA B</b> |                                                    |                         |                     |                 |
| <b>SUBTYPE</b>     | <b>STRAIN</b>                                      | <b>ACCESSION #</b>      | <b>PLASMI<br/>D</b> | <b>PROTEASE</b> |
| B                  | B/Hong Kong/8/1973                                 | K00425                  | phCMV1              | HAT             |
|                    | B/Victoria/2/1987                                  | FJ766840                | phCMV1              | HAT             |
|                    | B/Yamagata/16/1988                                 | CY018765.1              | phCMV1              | HAT             |
|                    | B/Florida/4/2006                                   | EU515992                | phCMV1              | HAT             |
|                    | B/Bangladesh/3333/2007                             | CY115255.1              | pI.18               | HAT             |
|                    | B/Brisbane/60/2008                                 | KX058884.1<br>EPI753679 | pI.18<br>pEVAC      | HAT             |
|                    | B/Phuket/3073/2013                                 |                         | pEVAC               | HAT             |
|                    | B/Colorado/06/2017                                 |                         | pEVAC               | HAT             |

|  |                     |            |       |     |
|--|---------------------|------------|-------|-----|
|  | B/Washington/2/2019 | EPI1368874 | pEVAC | HAT |
|--|---------------------|------------|-------|-----|

**Table S2.** Neutralization susceptibility reported as IC<sub>50</sub> dilution values of pseudotype viruses to HA specific antisera. IC<sub>50</sub> dilution values reported below were calculated using GraphPad PRISM 8.12 from the dose response curves shown Figure 5.

|                                            | HA subtype         | Estimated IC <sub>50</sub> dilution |
|--------------------------------------------|--------------------|-------------------------------------|
| <b>Human-associated IAV</b><br>(Figure 5a) | H1 (A/Br/18)       | 14521                               |
|                                            | H1 (A/En/09)       | 5011                                |
|                                            | H2                 | 2818                                |
|                                            | H3                 | 416                                 |
|                                            | H5                 | 489                                 |
|                                            | H7                 | 1659                                |
|                                            | H9                 | 3090                                |
| <b>Swine-associated IAV</b><br>(Figure 5b) | H1 A/Swine/Henan   | Not calculated from curve           |
|                                            | H1 A/Swine/Guangxi | 7943                                |
|                                            | H1 A/Swine/Beijing | 7762                                |
| <b>Avian-associated IAV</b><br>(Figure 5c) | H4 (A/GWT)         | 15135                               |
|                                            | H4 (A/CR)          | 10471                               |
|                                            | H6                 | Not calculated from curve           |
|                                            | H8                 | 34673                               |
|                                            | H10                | 3890                                |
|                                            | H11                | 17378                               |
|                                            | H12                | Not calculated from curve           |
|                                            | H13                | 912                                 |
|                                            | H14                | 131825                              |
|                                            | H15                | 5495                                |
|                                            | H16                | 2344                                |
| <b>Bat Sera</b>                            | H17                | 724                                 |
|                                            | H17                | 537                                 |
|                                            | H17                | 645                                 |
| <b>IBV</b>                                 | B/Phuket (YAM)     | Not calculated from curve           |
|                                            | B/Yamagata (YAM)   | 5754                                |
|                                            | B/Washington (VIC) | 5370                                |
|                                            | B/Brisbane (VIC)   | Not calculated from curve           |
|                                            | B/Colorado (VIC)   | 14454                               |
|                                            | B/Victoria (VIC)   | 38904                               |
